# Supplementary material for: Coordination-driven self-assembly of 2D-metallamacrocycles using a shape-selective PtII2-organometallic 90° acceptor: design, synthesis and sensing study
Source: Royal Society of Chemistry journal article supplement (doi:10.1039/c1dt10790a), 2011-01-01
Supplement: c1dt10790a.pdf [file c1dt10790a.pdf]

## Supporting Information

Coordination-driven self-assembly of 2D-metallamacrocycles using a shape-selective Pt<sup>II</sup>-organometallic 90° acceptor: design, synthesis and sensing study

Sankarasekaran Shanmugaraju, Dipak Samanta, Bappaditya Gole and Partha Sarathi Mukherjee\*

*Department of Inorganic and Physical Chemistry, Indian Institute of Science, Bangalore-560*

*012, India. Fax: 91-80-2360-1552; Tel; 91-80-2293-3352*

*E-mail: [psm@ipc.iisc.ernet.in](mailto:psm@ipc.iisc.ernet.in)*

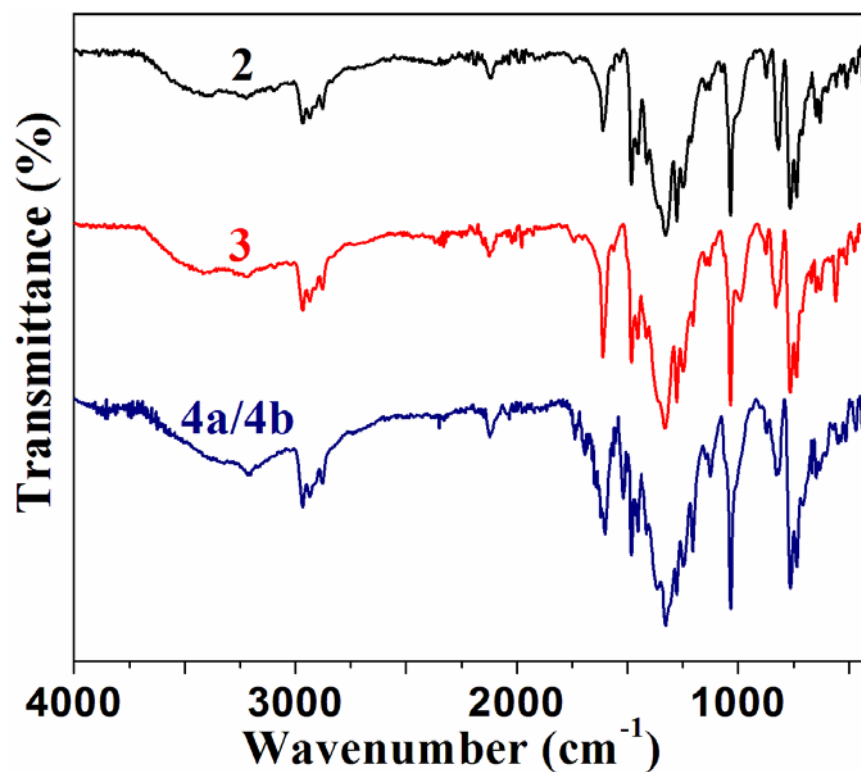

Fig.S1. Infra-red spectrum of the macrocycles 2 – 3 and 4a.

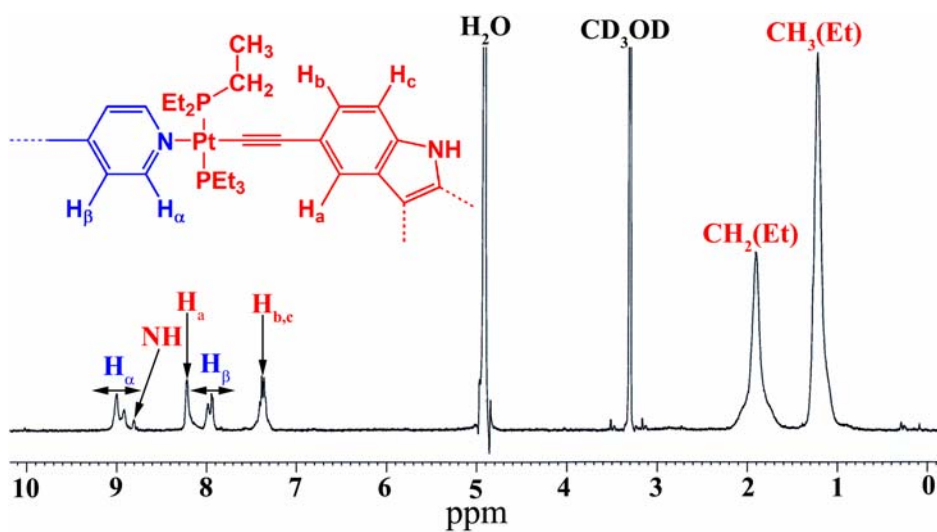

**Fig.S2.**  $^1\text{H}$  NMR spectrum of the molecular square **2** recorded in  $\text{CD}_3\text{OD}$  with the peak assignments.

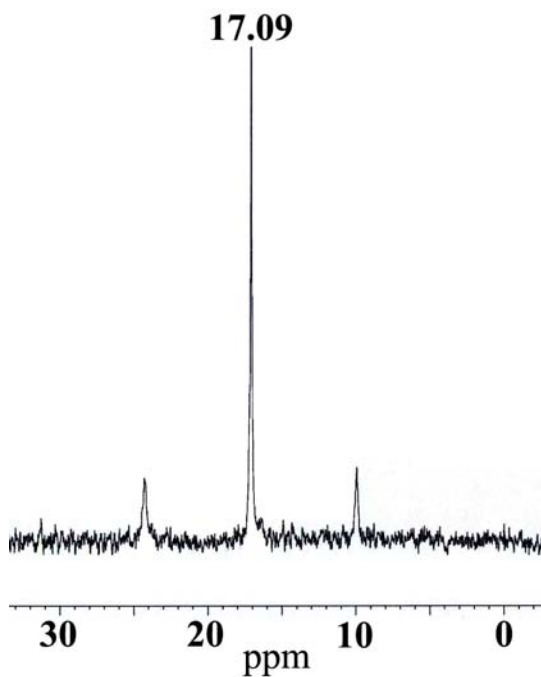

**Fig.S3.**  $^{13}\text{P}$  NMR spectrum of the molecular square **2** recorded in  $\text{CD}_3\text{OD}$ .

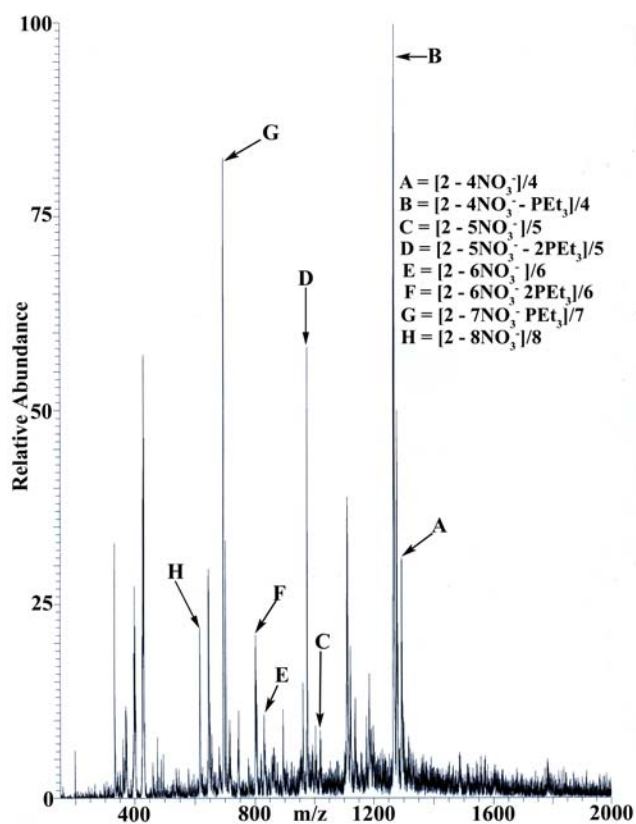

Fig.S4. ESI-MS spectrum of macrocycle **2** recorded in CH<sub>3</sub>CN/ CH<sub>3</sub>NO<sub>2</sub>.

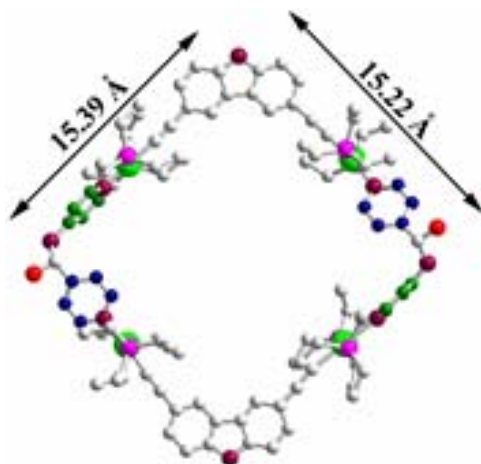

Fig.S5. Energy-minimized structures of rhomboid **4a** (green = Pt, magenta = P, reddish brown = N, red = O, grey = C). Blue and green color code indicating two different binding sites of linker. The hydrogen atoms are removed for the sake of clarity.

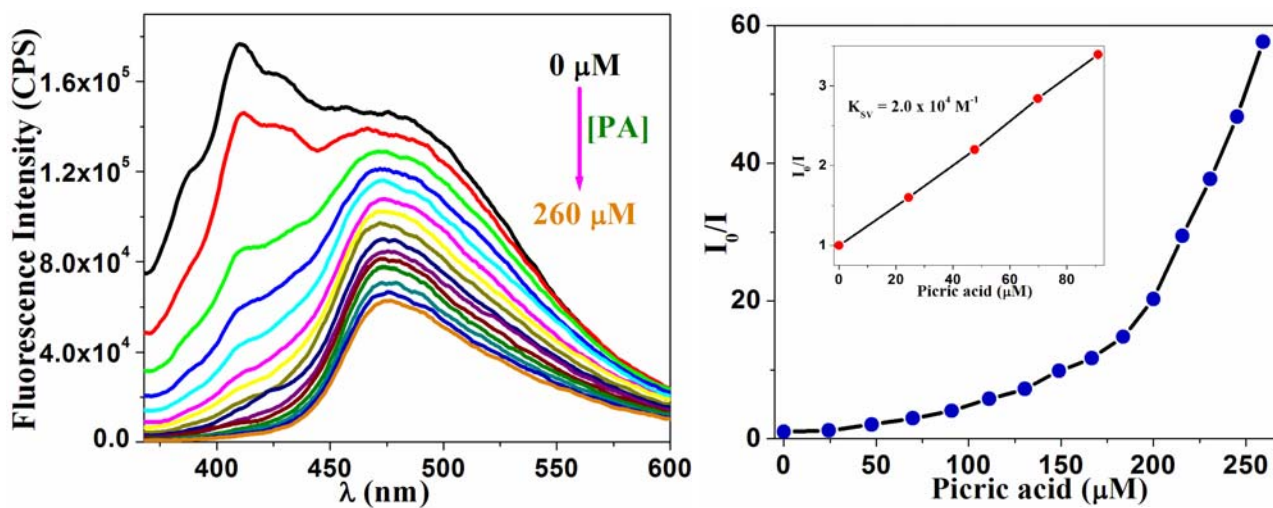

**Fig.S6.** Fluorescence quenching (left) of the macrocycle **2** ( $1.0 \times 10^{-6}$  M) with picric acid ( $1.0 \times 10^{-3}$  M) in DMF-methanol solution (excited at  $\lambda_{\text{ex}} = 324$  nm and corresponding emission monitored from  $\lambda_{\text{em}} = 368$  nm; excitation and emission slit width is 5 nm) and obtained Stern-Volmer plot; inset: Stern-Volmer plot obtained at lower concentration of picric acid (right).
